# Supplementary material for: Predicting risk of emergency admission to hospital using primary care data: derivation and validation of QAdmissions score
Source: PubMed Central journal article supplement — BMJ Open. 2013 Aug 17;3(8):e003482. doi: 10.1136/bmjopen-2013-003482 (PMC3753502; doi:10.1136/bmjopen-2013-003482), 2013-08-17
Supplement: bmjopen-2013-003482.draft_revisions.pdf [file bmjopen-2013-003482.draft_revisions.pdf]

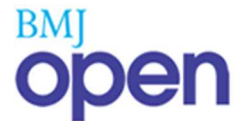

**Predicting risk of emergency admission to hospital using  
primary care data: derivation and validation of QAdmissions  
score**

|                                 |                                                                                                                                     |
|---------------------------------|-------------------------------------------------------------------------------------------------------------------------------------|
| Journal:                        | <i>BMJ Open</i>                                                                                                                     |
| Manuscript ID:                  | bmjopen-2013-003482                                                                                                                 |
| Article Type:                   | Research                                                                                                                            |
| Date Submitted by the Author:   | 26-Jun-2013                                                                                                                         |
| Complete List of Authors:       | Hippisley-Cox, Julia; University of Nottingham, ; ClinRisk Ltd, Coupland, Carol; University of Nottingham, Division of Primary Care |
| <b>Primary Subject Heading</b>: | Epidemiology                                                                                                                        |
| Secondary Subject Heading:      | Health informatics                                                                                                                  |
| Keywords:                       | PRIMARY CARE, PREVENTIVE MEDICINE, EPIDEMIOLOGY                                                                                     |
|                                 |                                                                                                                                     |

SCHOLARONE™  
Manuscripts

Peer Review Only

1  
2  
3  
4  
5  
6 **Predicting risk of emergency admission to hospital using primary care data:**  
7 **derivation and validation of QAdmissions score**  
8  
9

10  
11  
12 **Paper Presenting Original Research**

13 **Submitted to the BMJ Open June 2013**

14  
15 (original reference BMJ.2013.012731)  
16  
17  
18  
19

20  
21 **Authors**  
22

23  
24 Julia Hippisley-Cox Professor of Clinical Epidemiology & General Practice<sup>1</sup>  
25

26 Carol Coupland Associate Professor and Reader in Medical Statistics<sup>1</sup>  
27  
28  
29  
30

31 **Institutions**  
32

33  
34 Division of Primary Care, 13<sup>th</sup> floor, Tower Building, University Park, Nottingham, NG2 7RD.  
35  
36

37 **Guarantor & Author for correspondence - Julia Hippisley-Cox**

38 **Email:** Julia.hippisley-cox@nottingham.ac.uk  
39

40 **Telephone:** 0115 8466915  
41

42 **Fax:** 0115 8466904  
43  
44  
45  
46  
47  
48  
49  
50  
51  
52  
53  
54  
55  
56  
57  
58  
59  
60

## Predicting Risk of Emergency Admission - QAdmissions

**ABSTRACT**

**Objective** To develop and externally validate a risk algorithm (QAdmissions) to estimate risk of emergency hospital admission for patients aged 18-100 years in primary care.

**Design** Prospective open cohort study using routinely collected data from general practice linked to hospital episode data during the two year study period 01 January 2010 to 31 Dec 2011.

**Setting** 405 general practices in England contributing to the national QResearch database to develop the algorithm. Two validation cohorts to validate the algorithm (a) 202 different QResearch practices and (b) 343 practices in England contributing to the Clinical Practice Research DataLink (CPRD). All general practices had data linked to hospital episode statistics at individual patient level.

**Participants** We studied 2,849,381 patients aged 18-100 years in the derivation cohort with over 4.6 million person years of follow up. 265,573 of these patients had one or more emergency admissions during follow-up. For the QResearch validation cohort, we identified 1,340,622 patients aged 18-100 years with over 2.2 million person years of follow-up. 132,723 of these patients had one or more emergency admissions during follow-up. For the CPRD cohort identified 2,475,360 patients aged 18-100 years with over 3.8 million person years of follow-up. 234,204 of these patients had one or more emergency admissions during follow-up. We excluded patients without both a valid NHS number and a valid Townsend score.

**Endpoint** First (i.e. incident) emergency admission to hospital in the next two years as recorded on the linked hospital episodes records.

**Risk factors** Candidate variables recorded on the GP computer system including (a) demographic variables (age, sex, strategic health authority, Townsend deprivation score, ethnicity); (b) lifestyle variables (smoking, alcohol intake); (c) chronic diseases; (d) prescribed medication; (e) clinical values (body mass index, systolic blood pressure); (f) laboratory test results (haemoglobin, platelets, erythrocyte sedimentation rate (ESR), ratio of total serum cholesterol to high density lipoprotein cholesterol concentrations, liver function tests). We also included the number of emergency admissions in the preceding year based on information recorded on the linked hospital episodes records

## Predicting Risk of Emergency Admission - QAdmissions

**Results** The final QAdmissions algorithm incorporated 30 variables. When applied to the QResearch validation cohort, it explained 41% of the variation in women and 43% in men. The D statistic for QAdmissions was 1.7 in women and 1.8 in men. The receiver operating curve statistic was 0.78 for men and 0.77 for women. QAdmissions had good performance on all measures of discrimination and calibration. The positive predictive value for emergency admissions for the top tenth of patients at highest risk was 42% and the sensitivity was 39%. The results for the CPRD validation cohort were similar.

**Conclusion.** The QAdmissions model provided a valid measure of absolute risk of emergency admission to hospital in the general population as shown by its performance in a separate validation cohort. Further research is needed to evaluate the cost-effectiveness of using these algorithms in primary care.

**Article focus**

- Methods to identify patients at increased risk of emergency admission to hospital are needed to identify patients for whom interventions may be required to reduce risk of admission
- Current risk scoring methods are expensive, unpublished or difficult to implement.

**Key messages**

- We have developed and validated a new algorithm to quantify absolute risk of emergency admission to hospital which includes established risk factors and which is designed to work in primary care
- The QAdmissions model provides a valid measure of absolute emergency admission risk in the general population of patients as shown by its performance in a separate validation cohort.
- Further research is needed to evaluate the clinical outcomes and cost-effectiveness of using these algorithms in primary care.

**Web calculator**

Here is a simple web calculator to implement the QAdmissions algorithm which will be publically available alongside the paper. It also has the open source software for download.

URL <http://qadmissions.org>  
Username reviewer  
Password TrueFirstHorses

## 1 Introduction

Unplanned admissions account for an estimated 11 billion pounds a year in England which is a considerable proportion of the NHS budget[1]. Not only are such admissions costly but also potentially distressing to individuals. Successive governments have tried to implement approaches to prevent the rise in emergency admissions including identifying patients at high risk of emergency admission so that these patients can be targeted before preventable or avoidable costs have been incurred.

In Spring 2013, the NHS commissioning Board (now NHS England) announced a new Enhanced Service Specification to reward GP practices for the identification and case management of patients identified as seriously ill or at risk of an emergency admission[2]. As part of this, GP practices need to undertake risk profiling and risk stratification of their registered patients on at least a quarterly basis.

Central to any risk stratification and case identification program, is the accuracy and utility of the algorithm used to undertake the risk assessment. In general, a risk stratification algorithm needs to be developed using data from the setting where it will subsequently be used (e.g. primary care in England). It needs to be able to distinguish between patients who do or do not experience the event of interest (discrimination) and accurately quantify the level of risk (calibration). It should predict the outcome of interest (e.g. emergency admission) for the population of interest (e.g. all adult patients registered with the general practitioner). It needs to apply over the relevant time period (e.g. 1-2 years) assuming sufficient time is needed for interventions to have an effect. It needs to include predictors with good clinical face validity and, ideally, include some clinically relevant factors which are amenable to change (i.e. help reduce risk of emergency admission). It should preferably incorporate measures of socio-economic deprivation and ethnicity in recognition of the role these factors have as predictors of major diseases but also to prevent widening health inequalities which can occur when new programs are introduced. The risk algorithm needs to have the potential to be updated or recalibrated and its performance should be tested in a separate population of patients from that used to develop the tool to demonstrate that it can reliably identify the target population. Lastly, the tool needs to be suitable for implementation in clinical practice.

Whilst a number of emergency admission risk assessment tools have been developed, they are generally designed for use in hospital to identify patients at risk of re-admission [3-5]. Other current tools focus on specific populations or have not been published or validated. For example, there are a number of American algorithms based on patients enrolled in health maintenance organisations with questionable generalizability [6-8]. There are several tools which have been intended for use in primary care. The Emergency Admission Risk Likelihood Index (EARLI) is a six item questionnaire which was developed using data from patients aged 75+ from 17 general practices in the North of England [9]. Hence it only applies to elderly patients and may not be sufficiently representative for wider use. The PEONY score was designed for use in Scottish primary care patients aged 40-65 years [10]. However, it does not include morbidity data from primary care and currently the underlying algorithm is not published or independently validated. Lastly the Combined Predictive Model[11] (CPM), developed using data from two Primary Care Trusts, had been designed to work on primary care data linked to three secondary care data sources (inpatient,

## Predicting Risk of Emergency Admission - QAdmissions

1  
2  
3 outpatient, accident and emergency). However the Department of Health announced in  
4 August 2011 that tools were outdated and in urgent need of a refresh[12].  
5  
6

7  
8 One problem which has beset all the existing risk algorithms is the practical difficulty in  
9 implementing them into primary care since they have not been designed to run off  
10 routinely collected data already in GP computer systems or been validated in that setting.  
11 Whilst it's possible to extract the primary care data from GP clinical systems into a data  
12 warehouse for linkage, processing and feeding back to the practice, this is a complex  
13 technical process to achieve in real time. It also has significant information governance  
14 challenges given the necessary controls around the processing of personal confidential data  
15 by third parties without patient consent.  
16

17  
18 Therefore, we decided to develop and validate a new risk prediction algorithm to predict  
19 the absolute risk of emergency admissions to hospital (QAdmissions) which could meet the  
20 above requirements. We were interested to develop an algorithm which incorporates  
21 ethnicity and clinical diagnoses, medications and abnormal laboratory results which the  
22 health care professional in the practice can then follow up. In addition, we decided to  
23 develop a tool which could be automatically populated using data solely from GP computer  
24 systems and so provide an expedient practical alternative where primary care data are not  
25 routinely linked to secondary care data.  
26  
27  
28  
29  
30  
31  
32  
33

## 2 Methods

### 2.1 Study design and data source

34  
35  
36  
37  
38  
39  
40 We conducted a prospective cohort study studying a large UK primary care population using  
41 a similar method to our analyses for other risk prediction scores such as QRISK2 [13].  
42 Version 35 of the QResearch database was used for this study (<http://www.qresearch.org>).  
43 This is a large validated primary care electronic database containing the health records of 13  
44 million patients registered from 660 general practices using the Egton Medical Information  
45 System (EMIS) computer system[13]. Practices and patients contained on the database are  
46 nationally representative[14] and similar to those on other primary care databases using  
47 other clinical software systems[15]. We included all QResearch practices in England once  
48 they had been using their current EMIS system for at least a year (to ensure completeness  
49 of recording of morbidity and prescribing data), randomly allocating two thirds of practices  
50 to the derivation dataset with one-third to the validation dataset. The analysis was  
51 conducted on QResearch practices in England in order to incorporate hospital episode data  
52 linked at individual patient level via pseudonymised NHS number. We also assembled a  
53 second validation cohort using 343 English practices contributing to the Clinical Research  
54 Data Link which had linked HES data (August 2012 download).  
55  
56  
57  
58

## Predicting Risk of Emergency Admission - QAdmissions

### 2.2 Cohort selection

We identified three open cohorts of patients aged 18-100 at the study entry date, drawn from patients registered with eligible practices between 01 January 2010 and 31 Dec 2011. We used an open cohort design, rather than a closed cohort design, as this allows patients to enter the population throughout the whole study period rather than require registration on 01 January 2010 thus better reflecting the realities of routine general practice. We excluded registered patients without a valid pseudonymised NHS number as this was needed to link the primary and secondary care data together. We also excluded patients without a valid postcode related Townsend deprivation score.

For each patient we determined an entry date to the cohort, which was the latest of the following dates: 18<sup>th</sup> birthday, date of registration with the practice plus one year, date on which the practice computer system was installed plus one year, and the beginning of the study period (01 January 2010). Patients were censored at the earliest date of: the first emergency hospital admission in the study period, death, deregistration with the practice, last upload of computerised data or the study end date (31 Dec 2011).

### 2.3 Emergency hospital admission outcomes

The primary outcome measure of interest was the first recorded emergency admission to hospital in the study period. We identified emergency hospital admissions from the Hospital Episode Statistics (HES) data which includes all hospital trusts in England. The hospital episode data was linked at individual patient level to the QResearch database via pseudonymised NHS number. Emergency admissions were identified by selecting the standard codes to represent all emergency admission in England. This information is derived from the method of admission field recorded for each admission. The following codes were included - coded as 21 (accident and emergency); 22 (GP direct to hospital); 23 (GP via bed bureau); 24 (consultant clinic); 25 (mental health crisis resolution team); 28 (Other means). We only included emergency admissions where the admission date and discharge date were both recorded and where the admission date was on or before the discharge date.

### 2.4 Risk factors for emergency admission

We identified a list of candidate variables, focusing on variables which have previously been established to increase risk of emergency admission[10] or re-admission[4 7]. We also included predictors used in other risk algorithms where the outcome is likely to require emergency admission (for example as thrombosis[16] or cardiovascular disease[17 18]). We decided to focus on variables which are recorded in the primary care electronic record in order to ensure that the resulting algorithm could be implemented into existing GP computer systems in a similar way to the implementation of similar risk prediction



## Predicting Risk of Emergency Admission - QAdmissions

1  
2  
3 algorithms developed using the QResearch database [4 11-14]. The full list of candidate  
4 variables is shown in Table 1 and is summarized here:

- 5  
6  
7 (a) demographic variables: age, sex, Strategic Health Authority, Townsend deprivation  
8 score, ethnicity  
9 (b) Lifestyle variables: smoking status, alcohol intake  
10 (c) Chronic diseases  
11 (d) Medication for statins, NSAIDs, anticoagulants, corticosteroids, antidepressants and  
12 antipsychotics at study entry date.  
13 (e) Clinical values: body mass index, systolic blood pressure  
14 (f) Laboratory test results: haemoglobin, platelets, ESR, total serum cholesterol/HDL  
15 ratio, liver function tests.  
16 (g) Emergency admissions in the year before study entry date (none, 1, 2, 3 or more).  
17  
18  
19

20  
21 All the above variables were derived from the patients' primary care record except for the  
22 number of emergency admissions in the year before the study entry date where we used  
23 the HES linked data. We restricted all values of these candidate predictor variables to those  
24 recorded in the person's electronic healthcare record before baseline, except for ethnicity  
25 where we used the most recently recorded value in the study period before the patient had  
26 the outcome or was censored.  
27

28 We imputed missing values where necessary as described below. Given the large number of  
29 candidate variables, we combined factors where appropriate. For example, we combined (a)  
30 asthma and chronic obstructive airways disease; (b) schizophrenia and manic depression.  
31 We defined abnormal liver function tests as a single variable which denoted either a high  
32 gamma GT, AST or bilirubin where a high value was at least three times the upper limit of  
33 normal.  
34  
35

### 36 2.5 Model derivation and development

37  
38  
39 As in previous studies[17], we used the Cox proportional hazards model in the derivation  
40 dataset to estimate the coefficients and hazard ratios associated with each potential risk  
41 factor for the first recorded emergency admission to hospital for males and females  
42 separately. We used fractional polynomials to model non-linear risk relationships with age  
43 and body mass index where appropriate[19 20]. We tested for interactions between each  
44 variable and age and included significant interactions in the final model where they  
45 improved model fit. Continuous variables were centered for analysis. Our main analyses  
46 used multiple imputation to replace missing values for systolic blood pressure, cholesterol,  
47 smoking status, alcohol status and body mass index.  
48  
49  
50

51  
52 Our final model was fitted based on five multiply imputed datasets using Rubin's rules to  
53 combine estimates and standard errors to allow for the uncertainty due to imputing missing  
54 data[20] [21]. We took the logarithm of the hazard ratio for each variable from the final  
55 model and used these as weights for the risk equations. We combined these weights with  
56 the baseline survivor function evaluated at 1 year and 2 years to derive a risk equation  
57  
58  
59



## Predicting Risk of Emergency Admission - QAdmissions

1  
2  
3 which could be applied for each time period. There were at least 100 outcome events per  
4 variable considered in the prediction modeling in the derivation cohort[22].  
5  
6  
7

### 2.6 Model Validation

8  
9

10  
11 We tested the performance of the final model (QAdmissions) in the QResearch validation  
12 cohort and also in a cohort of practices and patients derived from the Clinical Research Data  
13 Link (CPRD). We calculated the 2 year estimated risk of emergency admission for each  
14 patient in the validation datasets using multiple imputation to replace missing values as in  
15 the derivation dataset.  
16  
17

18 We calculated the mean predicted and observed risks at 2 years[13] and compared these by  
19 tenth of predicted risk for each score. The observed risk at 2 years was obtained using the 2  
20 year Kaplan-Meier estimate. We calculated the ROC statistic, D statistic (a measure of  
21 discrimination where higher values indicate better discrimination)[23] and an R squared  
22 statistic (which is a measure of explained variation for survival data where higher values  
23 indicate more variation is explained)[24].  
24

25 Since there is no currently accepted threshold for classifying a high risk of emergency  
26 admission based on an absolute risk estimate, we examined the distribution of predicted  
27 risk values for QAdmissions and calculated a series of centile values. For each centile  
28 threshold, we calculated the sensitivity and the observed risk of admission (as an estimate  
29 of the positive predictive value) over the two year follow-up.  
30  
31

32 For the main validation analyses, we estimated the risk of emergency admission using  
33 predictor variables derived from data recorded in the GP record except for prior emergency  
34 admissions which was derived from the HES-GP linked data.  
35

36 We repeated the analyses using data on hospital admissions recorded on the GP record  
37 instead of the HES linked data to derive the prior admissions variable. For this second  
38 analysis, we examined the clinical Read codes used to identify hospital admissions on the GP  
39 record and selected admissions which were coded either as emergency admissions or  
40 referral to accident and emergency. A list of the clinical codes used to identify prior hospital  
41 events on the GP data can be found in the first table of the appendix. This was then used  
42 alongside the other GP data derived predictor variables to calculate the risk scores. This was  
43 done to evaluate the performance of the algorithm in a primary care setting where GP-HES  
44 linked data is not available (GP-HES is not routinely available in all primary care settings).  
45  
46

47 All analyses were conducted on both the QResearch and CPRD validation cohorts. We used  
48 STATA (version 12.1) for all analyses.  
49  
50  
51  
52  
53  
54  
55  
56  
57  
58

## 3 Results

### 3.1 Practices and patients

Overall, 607 QResearch practices in England met our inclusion criteria and had been using their current computer system for at least one year. Of these, 405 were randomly assigned to the derivation dataset and 202 to the QResearch validation dataset. We identified 2,857,476 patients aged 18-100 years in the derivation cohort. Of these 4,518 (0.16%) had an invalid NHS number and 3,577 (0.13%) had a missing Townsend score leaving 2,849,381 eligible patients for analysis. Similarly, we identified 1,343,274 patients in the QResearch validation cohort. Of these 1,254 (0.09%) had an invalid NHS number and 1,398 (0.10%) had a missing Townsend score leaving 1,340,622 eligible patients for analysis.

**Error! Reference source not found.** compares the characteristics of eligible patients in the QResearch derivation and validation cohort. It also includes the characteristics of the 2,475,360 patients from 343 CPRD practices which met the inclusion criteria and which constitute the second validation cohort. The baseline characteristics of all three cohorts were similar except recording of ethnicity was higher in the two QResearch cohorts (75% and 76%) than in CPRD (53%).

### 3.2 Emergency admissions outcome

Table 2 shows the numbers of cases (patients with one or more admissions in follow-up) and incidence rates of first emergency admissions by age, sex, ethnicity and Strategic Health Authority in each cohort. Overall in the derivation cohort, we identified 265,573 patients (9.3% of 2,857,476) with an incident emergency admission arising from 4.6 million person years of observation. Of these, 181,784 (68.5%) had one admission and 83,789 (32.6%) had more than one emergency admission in the study period. Of the 265,573 patients with an emergency admission, 212,803 (80.1%) had no emergency admissions in the previous 12 months; 34,246 (12.9%) had one; 10,741 (4.0%) had two and 7,783 (2.9%) had 3 or more. The median duration of admission was 2 days (IQR 0-6 days).

In the QResearch validation cohort, we identified 132,723 patients (9.9% of 1,340,622) with an incident emergency admission arising from 2.2 million years of observation. Of these, 90,622 (68.3%) had one admission only and 42,101 (31.7%) had more than one admission. The median duration of admission was 2 days (IQR 0-6 days).

The crude incidence rate of emergency admission was higher in women than men and rose steeply with age. The age-sex standardized emergency admission rates varied between Strategic Health Authorities with highest rates in the SHAs in the North East. The emergency admission rates for the CPRD validation cohort as recorded on the CPRD\_HES linked data are similar to those for both QResearch cohorts for age, sex and ethnicity.

## Predicting Risk of Emergency Admission - QAdmissions

### 3.3 Model development

Table 3 shows the results of the Cox regression analysis for the final QAdmissions model. Details of the fractional polynomial terms for age and body mass index are shown in the footnote of the table. The final model included interactions between age and the following variables in men and women: prior admissions, type2 diabetes, venous thromboembolism, epilepsy, manic depression/schizophrenia, chronic renal disease, malabsorption, chronic liver/pancreatic disease, NSAIDs, anticoagulants, antidepressants and antipsychotics. In addition for men, there were interactions between age and atrial fibrillation and cardiovascular disease. The interactions with age indicated higher hazard ratios for these risk factors among younger patients compared with older patients.

Increasing material deprivation (as measured by the Townsend score) was associated with increasing risk of admission. Women in the Pakistani, Caribbean and Black African groups had significantly increased risks of emergency admission compared with women who were white or who didn't have ethnicity recorded. For men, Indian, Bangladeshi, Chinese and the other Asian group had significantly lower risks compared with men who were white or who didn't have ethnicity recorded.

Prior emergency admission to hospital was associated with increased risk of emergency admission in men and women. For example, compared with men with no emergency admissions in the previous 12 months, there was a 2.7-fold increased risk in men with one previous admission; a 4.4-fold increased risk for two prior admissions and an 8.3-fold increased risk for those with 3 or more prior admissions. There was a similar pattern for women.

There was a 'dose-response' relationship for smoking with heavy smokers having higher risks than moderate smokers, light smokers or ex-smokers. There was a 'J-shaped' effect for alcohol with lower risks for those recorded as trivial, light or moderate drinkers and higher risks than for those recorded as very heavy drinkers or non-drinkers. This was despite adjustment for a diagnosis of chronic liver/pancreatic disease and the presence of abnormal liver function tests.

All the other co-morbidities and medications in the table were significantly associated with increased risks in men and women. Patients with a haemoglobin value of <11g/dl, those with raised platelets and those with at least one abnormal liver function test also had increased risk of emergency admission.

### 3.4 Calibration and discrimination in the validation cohort

In the QResearch validation cohort, the QAdmissions risk scores calculated using the GP-HES linked data explained 41% of the variation in women and 43% in men (

## Predicting Risk of Emergency Admission - QAdmissions

Table 4). The D statistic was 1.7 in women and 1.8 in men. The ROC value was 0.77 for women and 0.78 for men.

Figure 2 displays the predicted and observed risks of emergency admission at 2 years across each tenth of predicted risk (1 representing the lowest risk and 10 the highest risk). This shows that the QAdmissions algorithm was well calibrated.

Table 5 shows the performance statistics for QAdmissions at different thresholds in the QResearch validation cohort using the GP-HES linked data and the GP data alone. For example, for the top 10% of men and women at highest risk based on the GP-HES data (i.e. those with a score of 23% or higher), then QAdmissions had a sensitivity of 39% and a positive predictive value (based on the observed risk at 2 years) of 42%.

The performance of the QAdmissions score calculated using the GP-HES linked data was marginally better than that using data from the GP record alone. For example, the ROC values for women were 0.77 using the GP-HES linked data and 0.76 for the GP data alone (

## Predicting Risk of Emergency Admission - QAdmissions

Table 4). Calibration was similar.

The results for the validation statistics in the CPRD cohort were very similar to those for the QResearch validation cohort, as shown in Tables 4 and 5.

Box one shows a clinical example of applying the QAdmissions score to two individual patients.

For peer review only

## 4 Discussion

### 4.1 Summary of key findings

We have developed and externally validated a new algorithm (QAdmissions) to identify patients at high risk of emergency admission to hospital using contemporaneous primary care data from the UK. The algorithm incorporates 30 predictor variables which are associated with increased risk of hospital admission including socio-demographic variables, lifestyle, morbidity, medication and laboratory results such as anaemia and abnormal liver function tests. The algorithm can be applied to any adult in a primary care setting regardless of whether they have had a prior emergency admission. The algorithm is intended to be used for regular batch processing a dataset containing an entire population to generate a rank ordered list of patients at high risk for further assessment and management. It can be integrated into GP clinical computer systems by the systems suppliers in a similar way to how other risk prediction tools such as QRISK2[17], QDiabetes[25] and QFracture[26] have been implemented. Alternatively, a standalone version is available at the publically available website [www.qadmissions.org](http://www.qadmissions.org). This can be used for the assessment of individual patients

QAdmissions provides an estimate of absolute risk of admission either at one year or two years – the latter being potentially useful for interventions which are likely to work over a more extended time period. It includes a weighting for geographical area at strategic health authority level to help take account of local differences in configuration of services. Like the Combined Predictive Model[11], it can be applied across the general population to help health organisations to design and implement interventions across the risk spectrum ranging from: prevention and wellness promotion for low risk patients; supported self-care interventions for moderate risk patients; early intervention care management for patients with emerging risk and intensive case management for very high risk patients[11].

We undertook an additional validation by applying the final QAdmissions model to GP data alone and compared with the results using GP-HES linked data. The results in both the QResearch and CPRD validation cohorts were comparable and hence provide evidence to support the implementation of QAdmissions within GP computer systems based on solely on GP data. This potentially overcomes one of the main logistical difficulties in implementing other risk scores since they require real time data linkage of primary data with secondary care data. Much of the apparent complexity relating to additional variables and interactions can be incorporated into the software using data already entered into the patient's electronic health record. The algorithm uses routinely collected data which means it can be easily and regularly updated to reflect changes in populations, improvements in data quality or coding, advances in knowledge and evolving guidelines.

As with the PEONY algorithm[10], QAdmissions includes age, deprivation, prior emergency admission and medications (e.g. antidepressants, antipsychotics, analgesics) and these were all significantly associated with an increased risk of emergency admission. We found similar interactions between these variables and age with higher risks in younger patients which

## Predicting Risk of Emergency Admission - QAdmissions

1  
2  
3 diminished with increasing age. We have included many more emergency admissions in the  
4 derivation sample (265,573 events rather than 6793); more up to date data (2010-2011  
5 rather than 1999-2004) which is important given the rise in emergency admission rates over  
6 the last 10 years. In contrast to PEONY, QAdmissions has been modeled using a more  
7 ethnically diverse population and includes morbidity in addition to prescribed medication.  
8 Apart from prior hospital admissions, all of the variables in the model are derived from the  
9 primary care record.  
10  
11

12  
13 Although not directly comparable because of differences both in the samples to which the  
14 algorithms can be applied and also the outcomes predicted, the positive predictive value for  
15 the top 1% of patients at highest risk was higher for QAdmissions (73%) than PEONY (59%)  
16 although the sensitivity was similar (7% vs. 8%). Our ROC value of 0.77 is comparable to the  
17 0.79 reported in the validation cohort of PEONY and significantly higher than the 0.69  
18 reported by the authors of the PARR score[4] and the 0.70 for PARR-30[27]. Our ROC value  
19 is also significantly higher than that reported by Donze et al (0.71) although their risk  
20 prediction model was designed to identify patients at high risk of 30 day re-admission to  
21 hospital which is a different outcome to the outcome in our study[28].  
22  
23  
24  
25

26 We have not provided definite comment on what threshold of absolute risk should be used  
27 for intervention as that would require cost-effectiveness analyses which are outside the  
28 scope of this study. We have, however, provided analyses using a range of thresholds of risk  
29 which can be used to help inform future analyses. Sensitivity is important as it is a measure  
30 of how well the algorithm performs in finding cases that might be suitable for intervention.  
31 If the risk threshold is set too high, then the sensitivity will be low and a large number of  
32 patients with emergency admission will be 'missed' by the algorithm. Conversely, a high risk  
33 threshold is likely to result in a better positive predictive value which means a higher  
34 proportion of those identified are likely to go on to have an emergency admission. So there  
35 is a balance to be struck between the sensitivity and positive predictive value of the score  
36 which depends on the risk threshold selected, resources available and likely effectiveness of  
37 the interventions. For example, if the top 1% of patient at highest risk are targeted, then  
38 patients with an estimated absolute risk of admission of greater than 69% will be identified.  
39 This will have a good positive predictive value (73%) but a low sensitivity (7%). If the top  
40 10% of patients at highest risk are identified, the sensitivity at this threshold will be 39% and  
41 the positive predictive value will be 42%. However, more patients will require assessment so  
42 the costs of the intervention will be higher.  
43  
44  
45  
46  
47  
48

### 4.2 Strengths and limitations of this study

49  
50 The methods to derive and validate this model are the same as for a range of other clinical  
51 risk prediction tools derived from the QResearch database [16 17 25 26 29]. The strengths  
52 and limitations of the approach have already been discussed in detail [15 16 25 30-32]  
53 including information on multiple imputation of missing data. In summary, key strengths  
54 include size, duration of follow up, representativeness, and lack of selection, recall and  
55  
56  
57  
58  
59



## Predicting Risk of Emergency Admission - QAdmissions

1  
2  
3 respondent bias. UK general practices have good levels of accuracy and completeness in  
4 recording clinical diagnoses and prescribed medications,[33] [34]. We think our study has  
5 good face validity since it has been conducted in the setting where the majority of patients  
6 in the UK are assessed, treated and followed up. Limitations include lack of formally  
7 adjudicated outcomes, information bias, and potential for bias due to missing data. Our  
8 database has linked data for admission to hospital and is therefore likely to have picked up  
9 the majority of emergency admissions thereby minimising ascertainment bias. There is  
10 scope for improvement in the recording of emergency admission on the GP clinical record as  
11 some codes are used which identify an admission has occurred but not the method or type  
12 of admission. An information standard for recording of hospital admissions on GP clinical  
13 records could help address this and is likely to improve the performance of the score when  
14 applied to GP data alone.  
15  
16  
17

18  
19 We excluded people without a valid NHS number as this was required to link the primary  
20 and secondary care data for individual patients. We also excluded patients without a valid  
21 deprivation score since this group may represent a more transient population where follow-  
22 up could be unreliable or unrepresentative. Their deprivation scores are unlikely to be  
23 missing at random so we did not think it would be appropriate to impute them.  
24  
25  
26

27 The present validation has been done on two completely separate sets of practices and  
28 individuals to those which were used to develop the score. One of the validation cohorts  
29 was derived from the QResearch database so the practices all use the same GP clinical  
30 computer system (EMIS – the computer system used by 55% of UK GPs). The favourable  
31 results from the validation which uses CPRD is a more stringent test since this is a fully  
32 external set of practices which use a different computer system. Ideally, an additional  
33 validation should be undertaken using another external data source by an independent  
34 team not involving the study authors.  
35  
36  
37

38 This QAdmissions model has been developed using data from general practices in England  
39 and includes a postcode based deprivation score. It is therefore not likely to be applicable  
40 for clinical use in international settings without some modification of the English-specific  
41 risk factors, and validation in the setting in which it is intended to be used.  
42  
43  
44

45 In summary we have developed and validated a new algorithm to predict risk of emergency  
46 hospital admission. QAdmissions has some advantages compared with current risk scoring  
47 methods. QAdmissions also provides an accurate measure of absolute risk of emergency  
48 hospital admission in the general population as shown by its performance in a separate  
49 validation cohort. Further research is needed to evaluate the clinical outcomes and cost-  
50 effectiveness of using this algorithm in primary care.  
51  
52  
53  
54  
55  
56  
57  
58  
59  
60

## 5 Other information

### 5.1 Acknowledgements

We acknowledge the contribution of EMIS practices who contribute to QResearch<sup>®</sup> and to the University of Nottingham and EMIS for expertise in establishing, developing and supporting the database. We acknowledge the contribution of the NHS Information Centre for pseudonymising the Hospital Episodes Statistics dataset so that data could be linked to patients in the QResearch database.

### 5.2 Approvals:

The project was approved in accordance with the QResearch<sup>®</sup> agreement with Trent Multi-Centre Research Ethics Committee. The validation of Qadmissions on CPRD was approved by the Independent Scientific Advisory Group (Reference 13\_079)

### 5.3 Contributorship

JHC initiated the study, undertook the literature review, data extraction, data manipulation and primary data analysis and write the first draft of the paper. CC contributed to the design, analysis, interpretation and drafting of the paper. All authors have read and approved the final manuscript.

### 5.4 Funding

There was no funding initially for this work. North East London Commissioning support group provided limited funding to support the later stages of this work. The National School for Primary Care Research contributed to the license costs of the Clinical Research Data Link which was used for the external validation of QAdmissions.

### 5.5 Competing Interests

JHC is professor of clinical epidemiology at the University of Nottingham and co-director of QResearch<sup>®</sup> – a not-for-profit organisation which is a joint partnership between the University of Nottingham and EMIS (leading commercial supplier of IT for 60% of general practices in the UK). JHC is also director of ClinRisk Ltd which produces open and closed source software to ensure the reliable and updatable implementation of clinical risk algorithms within clinical computer systems to help improve patient care. CC is associate professor of Medical Statistics at the University of Nottingham and a consultant statistician for ClinRisk Ltd.

## Predicting Risk of Emergency Admission - QAdmissions

### 5.6 Copyright

The Corresponding Author has the right to grant on behalf of all authors and does grant on behalf of all authors, an exclusive license (or non-exclusive for government employees) on a worldwide basis to the BMJ Publishing Group Ltd, and its Licensees to permit this article (if accepted) to be published in BMJ editions and any other BMJPG products and to exploit all subsidiary rights, as set out in our license ([bmj.com/advice/copyright.shtml](http://bmj.com/advice/copyright.shtml)).

### 5.7 Data Sharing statement

The patient level data from the QResearch are specifically licensed according to its governance framework. See [www.qresearch.org](http://www.qresearch.org) for further details. The QAdmissions algorithm will be published as open source software under the GNU Lesser Public License.

## 6 References

1. Lewis G, Curry N, Bardsley M. Choosing a predictive risk model: a guide for commissioners in England. In: Trust N, ed.: Nuffield Trust, 2011:20.
2. NHS England. Enhanced service specification: Risk profiling and care management scheme. Secondary Enhanced service specification: Risk profiling and care management scheme. 2013. <http://www.england.nhs.uk/wp-content/uploads/2013/03/ess-risk-profiling.pdf>.
3. Bottle A, Aylin P, Majeed A. Identifying patients at high risk of emergency hospital admissions: a logistic regression analysis. *J R Soc Med* 2006;**99**(8):406-14 doi: 10.1258/jrsm.99.8.406[published Online First: Epub Date]].
4. Billings J, Dixon J, Mijanovich T, et al. Case finding for patients at risk of readmission to hospital: development of algorithm to identify high risk patients. *BMJ* 2006;**333**(7563):327 doi: 10.1136/bmj.38870.657917.AE[published Online First: Epub Date]].
5. ISD Scotland. Scottish Patients at Risk of Readmission and Admission (SPARRA) - a report on the development of SPARRA. Secondary Scottish Patients at Risk of Readmission and Admission (SPARRA) - a report on the development of SPARRA 2011. <http://www.isdscotland.org/Health-Topics/Health-and-Social-Community-Care/SPARRA/2012-02-09-SPARRA-Version-3.pdf>.
6. Coleman EA, Wagner EH, Grothaus LC, et al. Predicting hospitalization and functional decline in older health plan enrollees: are administrative data as accurate as self-report? *Journal of the American Geriatrics Society* 1998;**46**(4):419-25
7. Marcantonio ER, McKean S, Goldfinger M, et al. Factors associated with unplanned hospital readmission among patients 65 years of age and older in a Medicare managed care plan. *The American journal of medicine* 1999;**107**(1):13-7
8. Reuben DB, Keeler E, Seeman TE, et al. Development of a method to identify seniors at high risk for high hospital utilization. *Medical care* 2002;**40**(9):782-93 doi: 10.1097/01.MLR.0000024611.65466.AE[published Online First: Epub Date]].

## Predicting Risk of Emergency Admission - QAdmissions

9. Lyon D, Lancaster GA, Taylor S, et al. Predicting the likelihood of emergency admission to hospital of older people: development and validation of the Emergency Admission Risk Likelihood Index (EARLI). *Fam Pract* 2007;**24**(2):158-67 doi: 10.1093/fampra/cml069[published Online First: Epub Date] | .
10. Donnan PT, Dorward DWT, Mutch B, et al. Development and Validation of a Model for Predicting Emergency Admissions Over the Next Year (PEONY): A UK Historical Cohort Study. *Arch Intern Med* 2008;**168**(13):1416-22 doi: 10.1001/archinte.168.13.1416[published Online First: Epub Date] | .
11. Wennberg D, Siegel MB, Darin B, et al. Combined predictive model - final report. London: The Kings Fund, 2006.
12. Department of Health. Risk Stratification and next steps with DH Risk Prediction tools – Patients at Risk of Re-hospitalisation and the Combined Predictive Model. Secondary Risk Stratification and next steps with DH Risk Prediction tools – Patients at Risk of Re-hospitalisation and the Combined Predictive Model 2011. [https://www.gov.uk/government/uploads/system/uploads/attachment\\_data/file/147179/dh\\_129005.pdf.pdf](https://www.gov.uk/government/uploads/system/uploads/attachment_data/file/147179/dh_129005.pdf.pdf).
13. Hippisley-Cox J, Coupland C, Vinogradova Y, et al. Derivation and validation of QRISK, a new cardiovascular disease risk score for the United Kingdom: prospective open cohort study. *BMJ* 2007;bmj.39261.471806.55 doi: 10.1136/bmj.39261.471806.55[published Online First: Epub Date] | .
14. Hippisley-Cox J, Vinogradova Y, Coupland C, et al. Comparison of key practice characteristics between general practices in England and Wales and general practices in the QRESEARCH data. Report to the Health and Social Care Information Centre.: University of Nottingham, 2005.
15. Hippisley-Cox J, Coupland C, Vinogradova Y, et al. Performance of the QRISK cardiovascular risk prediction algorithm in an independent UK sample of patients from general practice: a validation study. *Heart* 2008;**94**:34-39 doi: 10.1136/hrt.2007.134890[published Online First: Epub Date] | .
16. Hippisley-Cox J, Coupland C. Development and validation of risk prediction algorithm (QThrombosis) to estimate future risk of venous thromboembolism: prospective cohort study. *BMJ* 2011;**343**:d4656 doi: 10.1136/bmj.d4656[published Online First: Epub Date] | .
17. Hippisley-Cox J, Coupland C, Vinogradova Y, et al. Predicting cardiovascular risk in England and Wales: prospective derivation and validation of QRISK2. *BMJ* 2008;bmj.39609.449676.25 doi: 10.1136/bmj.39609.449676.25[published Online First: Epub Date] | .
18. Hippisley-Cox J, Coupland C, Brindle P. Predicting risk of ischaemic stroke in primary care: derivation and validation of QStroke and a comparison with CHADS2 and CHA2DS2VASc. *BMJ* 2013:(in press)
19. Royston P, Ambler G, Sauerbrei W. The use of fractional polynomials to model continuous risk variables in epidemiology. *Int J Epidemiol* 1999;**28**:964-74
20. Gray A, Clarke P, Farmer A, et al. Implementing intensive control of blood glucose concentration and blood pressure in type 2 diabetes in England: cost analysis (UKPDS 63). *BMJ* 2002;**325**(7369):860
21. Royston P. Multiple imputation of missing values. *Stata Journal* 2004;**4**(3):227-41
22. Steyerberg E. *Clinical Prediction Models*: Springer, 2009.

## Predicting Risk of Emergency Admission - QAdmissions

23. Royston P, Sauerbrei W. A new measure of prognostic separation in survival data. *Stat Med* 2004;**23**:723-48
24. Royston P. Explained variation for survival models. *Stata J* 2006;**6**:1-14
25. Hippisley-Cox J, Coupland C, Robson J, et al. Predicting risk of type 2 diabetes in England and Wales: prospective derivation and validation of QDScore. *BMJ* 2009;**338**:b880-  
doi: 10.1136/bmj.b880[published Online First: Epub Date]].
26. Hippisley-Cox J, Coupland C. Derivation and validation of updated QFracture algorithm to predict risk of osteoporotic fracture in primary care in the United Kingdom: prospective open cohort study. *Bmj* 2012;**344**(may22 1):e3427-e27 doi: 10.1136/bmj.e3427[published Online First: Epub Date]].
27. Billings J, Blunt I, Steventon A, et al. Development of a predictive model to identify inpatients at risk of re-admission within 30 days of discharge (PARR-30). *BMJ Open* 2012;**2**(4) doi: 10.1136/bmjopen-2012-001667[published Online First: Epub Date]].
28. Donzé J ADWDSJL. Potentially avoidable 30-day hospital readmissions in medical patients: Derivation and validation of a prediction model. *JAMA Internal Medicine* 2013;**173**(8):632-38 doi: 10.1001/jamainternmed.2013.3023[published Online First: Epub Date]].
29. Hippisley-Cox J, Coupland C. Predicting the risk of Chronic Kidney Disease in Men and Women in England and Wales: prospective derivation and external validation of the QKidney(R) Scores. *BMC Family Practice* 2010;**11**:49
30. Hippisley-Cox J, Coupland C. Predicting risk of osteoporotic fracture in men and women in England and Wales: prospective derivation and validation of QFractureScores. *BMJ* 2009;**339**:b4229- doi: 10.1136/bmj.b4229[published Online First: Epub Date]].
31. Collins GS, Mallett S, Altman DG. Predicting risk of osteoporotic and hip fracture in the United Kingdom: prospective independent and external validation of QFractureScores. *BMJ* 2011;**342**:d3651
32. Collins GS, Altman DG. External validation of the QDScore for predicting the 10-year risk of developing Type 2 diabetes. *Diabetic Medicine* 2011;**28**:599-607 doi: 10.1111/j.1464-5491.2011.03237.x[published Online First: Epub Date]].
33. Jick H, Jick SS, Derby LE. Validation of information recorded on general practitioner based computerised data resource in the United Kingdom. *British Medical Journal* 1991;**302**:766-68
34. Majeed A. Sources, uses, strengths and limitations of data collected in primary care in England. *Health Statistics Quarterly* 2004(21):5-14

**Table 1** Baseline characteristics of patients in the QResearch derivation, the QResearch validation cohorts and the CPRD validation cohort. Values are numbers (percentages of total number in cohort) unless stated otherwise.

|                                   | QResearch<br>Derivation<br>(n=2,849,381) | QResearch<br>Validation<br>(n=1,340,622) | CPRD<br>Validation<br>(n=2,475,360) |
|-----------------------------------|------------------------------------------|------------------------------------------|-------------------------------------|
| female                            | 1446784 (50.8)                           | 677897 (50.6)                            | 1260015 (50.9)                      |
| male                              | 1402597 (49.2)                           | 662725 (49.4)                            | 1215345 (49.1)                      |
| Mean age (SD)                     | 46.3 (18.9)                              | 47.8 (18.6)                              | 48.2 (18.6)                         |
| <b>Strategic Health Authority</b> |                                          |                                          |                                     |
| East Midlands SHA                 | 225092 (7.9)                             | 165734 (12.4)                            | 70695 (2.9)                         |
| Yorkshire & Humberside SHA        | 220560 (7.7)                             | 75976 (5.7)                              | 287374 (11.6)                       |
| East of England SHA               | 197453 (6.9)                             | 158962 (11.9)                            | 390573 (15.8)                       |
| London SHA                        | 560544 (19.7)                            | 234346 (17.5)                            | 52618 (2.1)                         |
| North East SHA                    | 141974 (5.0)                             | 103200 (7.7)                             | 398889 (16.1)                       |
| North West SHA                    | 268958 (9.4)                             | 264508 (19.7)                            | 317867 (12.8)                       |
| South Central SHA                 | 310830 (10.9)                            | 74588 (5.6)                              | 274296 (11.1)                       |
| South East SHA                    | 253288 (8.9)                             | 63455 (4.7)                              | 314779 (12.7)                       |
| South West SHA                    | 421052 (14.8)                            | 92822 (6.9)                              | 275566 (11.1)                       |
| West Midlands SHA                 | 249630 (8.8)                             | 107031 (8.0)                             | 92703 (3.7)                         |
| <b>Ethnicity</b>                  |                                          |                                          |                                     |
| ethnicity recorded                | 2129124 (74.7)                           | 1015630 (75.8)                           | 1301115 (52.6)                      |
| White/not recorded                | 2554557 (89.7)                           | 1212057 (90.4)                           | 2320487 (93.7)                      |
| Indian                            | 49360 (1.7)                              | 22888 (1.7)                              | 31800 (1.3)                         |
| Pakistani                         | 23947 (0.8)                              | 15243 (1.1)                              | 13739 (0.6)                         |
| Bangladeshi                       | 22309 (0.8)                              | 11076 (0.8)                              | 4482 (0.2)                          |
| Other Asian                       | 38463 (1.3)                              | 14870 (1.1)                              | 22394 (0.9)                         |
| Caribbean                         | 23704 (0.8)                              | 9038 (0.7)                               | 11086 (0.4)                         |
| Black African                     | 43471 (1.5)                              | 22355 (1.7)                              | 26533 (1.1)                         |
| Chinese                           | 28803 (1.0)                              | 8086 (0.6)                               | 7514 (0.3)                          |
| Other                             | 64767 (2.3)                              | 25009 (1.9)                              | 37325 (1.5)                         |
| <b>Smoking status</b>             |                                          |                                          |                                     |
| smoking status recorded           | 2766234 (97.1)                           | 1300728 (97.0)                           | 2388744 (96.5)                      |
| non smoker                        | 1568956 (55.1)                           | 731480 (54.6)                            | 1220054 (49.3)                      |
| Ex-smoker                         | 612156 (21.5)                            | 288031 (21.5)                            | 642110 (25.9)                       |
| light smoker (1-9/day)            | 353026 (12.4)                            | 165471 (12.3)                            | 161185 (6.5)                        |
| moderate smoker (10-19/day)       | 152631 (5.4)                             | 75157 (5.6)                              | 210441 (8.5)                        |
| heavy smoker (20+/day)            | 79465 (2.8)                              | 40589 (3.0)                              | 120768 (4.9)                        |
| smoker amount not recorded        | n/a                                      | n/a                                      | 34,186 (1.4)                        |
| <b>Alcohol intake</b>             |                                          |                                          |                                     |
| Alcohol status recorded           | 2340360 (82.1)                           | 1097278 (81.8)                           | 1968156 (79.5)                      |
| non drinker                       | 746788 (26.2)                            | 354328 (26.4)                            | 393692 (15.9)                       |
| Trivial <1 unit/day               | 792730 (27.8)                            | 368465 (27.5)                            | 878965 (35.5)                       |
| Light 1-2 units/day               | 365897 (12.8)                            | 166881 (12.4)                            | 508687 (20.6)                       |
| Moderate 3-6 units/day            | 387161 (13.6)                            | 183738 (13.7)                            | 150466 (6.1)                        |



## Predicting Risk of Emergency Admission - QAdmissions

|                                                        |                |                |                |
|--------------------------------------------------------|----------------|----------------|----------------|
| Heavy 7-9 units/day                                    | 27501 (1.0)    | 13579 (1.0)    | 17695 (0.7)    |
| Very Heavy >9 units/day                                | 16260 (0.6)    | 8112 (0.6)     | 18651 (0.8)    |
| Drinker - amount not recorded                          | 4023 (0.1)     | 2175 (0.2)     | 0 (0)          |
| <b>emergency admissions in past year (HES record)</b>  |                |                |                |
| no emergency admission (HES record)                    | 2695651 (94.6) | 1264555 (94.3) | 2334640 (94.3) |
| 1 emergency admission (HES record)                     | 118002 (4.1)   | 58078 (4.3)    | 107182 (4.3)   |
| 2 emergency admission (HES record)                     | 23301 (0.8)    | 11687 (0.9)    | 21802 (0.9)    |
| 3+ emergency admissions (HES record)                   | 12427 (0.4)    | 6302 (0.5)     | 11736 (0.5)    |
| <b>Emergency admissions in past year (GP record)</b>   |                |                |                |
| no emergency admission (GP record)                     | 2731533 (95.9) | 1283422 (95.7) | 2261885 (91.4) |
| 1 emergency admission (GP record)                      | 89457 (3.1)    | 44263 (3.3)    | 158723 (6.4)   |
| 2 emergency admission (GP record)                      | 19581 (0.7)    | 8812 (0.7)     | 36567 (1.5)    |
| 3+ emergency admissions (GP record)                    | 8810 (0.3)     | 4125 (0.3)     | 18185 (0.7)    |
| <b>Clinical values, family history and deprivation</b> |                |                |                |
| Body mass index recorded                               | 2281550 (80.1) | 1083278 (80.8) | 1980327 (80.0) |
| Mean body mass index (SD)                              | 26.1 (4.9)     | 26.4 (4.9)     | 26.4 (5.0)     |
| systolic blood pressure recorded*                      | 2437745 (85.6) | 1186261 (88.5) | n/a            |
| Mean systolic blood pressure (SD)                      | 127.0 (16.4)   | 127.3 (16.5)   | n/a            |
| cholesterol/HDL recorded*                              | 824938 (29.0)  | 413117 (30.8)  | n/a            |
| Mean cholesterol/HDL ratio                             | 3.8 (1.2)      | 3.8 (1.2)      | n/a            |
| family history CHD*                                    | 327668 (11.5)  | 169286 (12.6)  | n/a            |
| mean Townsend score (SD)                               | 0.1 (3.6)      | 0.1 (3.5)      | -0.7 (3.1)     |
| Haemoglobin recorded                                   | 1645857 (57.8) | 816261 (60.9)  | 1512841 (61.1) |
| Haemoglobin < 11g/dl                                   | 56293 (2.0)    | 28113 (2.1)    | 49339 (2.0)    |
| Platelets recorded                                     | 1632357 (57.3) | 810551 (60.5)  | 1505945 (60.8) |
| Platelets > 480                                        | 16501 (0.6)    | 8434 (0.6)     | 14127 (0.6)    |
| Liver function test recorded                           | 1225813 (43.0) | 628439 (46.9)  | 1148893 (46.4) |
| Abnormal liver function tests                          | 34260 (1.2)    | 19112 (1.4)    | 32230 (1.3)    |
| Erythrocyte sedimentation rate (ESR) recorded          | 755536 (26.5)  | 409183 (30.5)  | n/a            |
| Abnormal Erythrocyte sedimentation rate (ESR)          | 5989 (0.2)     | 3306 (0.2)     | n/a            |
| <b>comorbidity</b>                                     |                |                |                |
| Type 1 diabetes                                        | 11000 (0.4)    | 5445 (0.4)     | 9854 (0.4)     |
| type 2 diabetes                                        | 125374 (4.4)   | 63461 (4.7)    | 117754 (4.8)   |
| atrial fibrillation                                    | 52603 (1.8)    | 26285 (2.0)    | 48490 (2.0)    |
| cardiovascular disease                                 | 154825 (5.4)   | 79116 (5.9)    | 150108 (6.1)   |
| congestive cardiac failure                             | 27404 (1.0)    | 14304 (1.1)    | 22685 (0.9)    |
| venous thromboembolism                                 | 42870 (1.5)    | 21298 (1.6)    | 37925 (1.5)    |



## Predicting Risk of Emergency Admission - QAdmissions

|                                       |               |               |               |
|---------------------------------------|---------------|---------------|---------------|
| cancer                                | 97279 (3.4)   | 48370 (3.6)   | 82513 (3.3)   |
| asthma or COPD                        | 378048 (13.3) | 179635 (13.4) | 342371 (13.8) |
| epilepsy                              | 36615 (1.3)   | 17904 (1.3)   | 34607 (1.4)   |
| falls                                 | 124248 (4.4)  | 64299 (4.8)   | 172555 (7.0)  |
| manic depression or schizophrenia     | 21277 (0.7)   | 10155 (0.8)   | 16792 (0.7)   |
| chronic renal disease                 | 9841 (0.3)    | 4700 (0.4)    | 9476 (0.4)    |
| Conditions leading to malabsorption   | 29206 (1.0)   | 14432 (1.1)   | 19078 (0.8)   |
| chronic liver disease or pancreatitis | 15811 (0.6)   | 7669 (0.6)    | 10895 (0.4)   |
| valvular heart disease*               | 30924 (1.1)   | 15960 (1.2)   | n/a           |
| treated hypertension*                 | 371503 (13.0) | 188901 (14.1) | n/a           |
| rheumatoid arthritis or SLE*          | 45966 (1.6)   | 23020 (1.7)   | n/a           |
| depression (QOF definition)*          | 372341 (13.1) | 176638 (13.2) | n/a           |
| <b>current prescribed medication</b>  |               |               |               |
| statins*                              | 341765 (12.0) | 174252 (13.0) |               |
| NSAIDs                                | 416749 (14.6) | 208936 (15.6) | 365927 (14.8) |
| anticoagulants                        | 38790 (1.4)   | 19764 (1.5)   | 36166 (1.5)   |
| corticosteroids                       | 101067 (3.5)  | 49683 (3.7)   | 109847 (4.4)  |
| antidepressants                       | 341194 (12.0) | 168305 (12.6) | 302457 (12.2) |
| antipsychotics                        | 74039 (2.6)   | 38324 (2.9)   | 69498 (2.8)   |

\*denotes variables which were considered but which didn't meet the criteria for inclusion in the final model. These variables were therefore not needed from CPRD for the external validation so have been reported as not applicable.

Predicting Risk of Emergency Admission - QAdmissions

**Table 2** Incidence rates of first emergency admissions to hospital during follow-up for men and women in the QResearch derivation , the QResearch validation cohort and the CPRD validation cohort. Rates are per 100,000 person years. Adjusted rates have been directly standardized by age and sex using 5 year ageband.

|                 | QResearch Derivation cohort |             |                                                    | QResearch Validation cohort |                |                                                    | CPRD validation cohort |             |                                                    |
|-----------------|-----------------------------|-------------|----------------------------------------------------|-----------------------------|----------------|----------------------------------------------------|------------------------|-------------|----------------------------------------------------|
|                 | cases                       | pyrs        | Crude rate per 1000(95% CI)                        | cases                       | pyrs           | Crude rate per 1000(95% CI)                        | cases                  | pyrs        | Crude rate per 1000(95% CI)                        |
| <b>total</b>    | 265,573                     | 4,597,543   | <b>57.8 (57.5 to 58.0)</b>                         | <b>132723</b>               | <b>2222285</b> | <b>59.7 (59.4 to 60.0)</b>                         | 234,204                | 3,878,996   | 60.4 (60.1 to 60.6)                                |
| female          | 143,524                     | 2,307,505   | 62.2 (61.9 to 62.5)                                | 71,700                      | 1,116,041      | 64.2 (63.8 to 64.7)                                | 126,630                | 1,962,447   | 64.5 (64.2 to 64.9)                                |
| male            | 122,049                     | 2,290,038   | 53.3 (53.0 to 53.6)                                | 61,023                      | 1,106,244      | 55.2 (54.7 to 55.6)                                | 107,574                | 1,916,550   | 56.1 (55.8 to 56.5)                                |
| <b>Ageband</b>  |                             |             |                                                    |                             |                |                                                    |                        |             |                                                    |
| 18-24 years     | 19,563                      | 546,478     | 35.8 (35.3 to 36.3)                                | 8,687                       | 218,427        | 39.8 (38.9 to 40.6)                                | 15,749                 | 378,473     | 41.6 (41.0 to 42.3)                                |
| 25-34 years     | 26,301                      | 799,454     | 32.9 (32.5 to 33.3)                                | 12,798                      | 366,120        | 35.0 (34.4 to 35.6)                                | 22,264                 | 608,225     | 36.6 (36.1 to 37.1)                                |
| 35-44 years     | 29,210                      | 861,476     | 33.9 (33.5 to 34.3)                                | 15,193                      | 426,812        | 35.6 (35.0 to 36.2)                                | 25,738                 | 735,573     | 35.0 (34.6 to 35.4)                                |
| 45-54 years     | 32,359                      | 821,316     | 39.4 (39.0 to 39.8)                                | 16,186                      | 415,342        | 39.0 (38.4 to 39.6)                                | 28,572                 | 732,828     | 39.0 (38.5 to 39.4)                                |
| 55-64 years     | 34,350                      | 678,292     | 50.6 (50.1 to 51.2)                                | 17,425                      | 343,970        | 50.7 (49.9 to 51.4)                                | 31,255                 | 621,903     | 50.3 (49.7 to 50.8)                                |
| 65-74 years     | 39,516                      | 483,667     | 81.7 (80.9 to 82.5)                                | 20,362                      | 248,334        | 82.0 (80.9 to 83.1)                                | 35,931                 | 438,517     | 81.9 (81.1 to 82.8)                                |
| 75+ years       | 84,274                      | 406,859     | 207 (206 to 209)                                   | 42,072                      | 203,280        | 207 (205 to 209)                                   | 74,695                 | 363,477     | 206 (204 to 207)                                   |
|                 |                             |             |                                                    |                             |                |                                                    |                        |             |                                                    |
|                 |                             |             | <b>Age/sex standardised rate per 1000 (95% CI)</b> |                             |                | <b>Age/sex standardised rate per 1000 (95% CI)</b> |                        |             | <b>Age/sex standardised rate per 1000 (95% CI)</b> |
| <b>SHA</b>      | <b>cases</b>                | <b>pyrs</b> |                                                    | <b>cases</b>                | <b>pyrs</b>    |                                                    | <b>cases</b>           | <b>pyrs</b> |                                                    |
| East Midlands   | 18,226                      | 353,210     | 53.3 (52.6 to 54.1)                                | 16,269                      | 283,709        | 54.9 (54.1 to 55.7)                                | 5,185                  | 76,158      | 69.0 (67.2 to 70.8)                                |
| Yorks & Humber  | 21,018                      | 346,172     | 61.5 (60.7 to 62.3)                                | 8,458                       | 129,444        | 61.9 (60.6 to 63.2)                                | 24,987                 | 430,346     | 55.2 (54.5 to 55.8)                                |
| East of England | 19,633                      | 333,388     | 53.6 (52.8 to 54.3)                                | 13,822                      | 262,783        | 51.7 (50.8 to 52.5)                                | 30,149                 | 585,433     | 56.4 (55.8 to 57)                                  |
| London          | 39,647                      | 846,604     | 55.8 (55.3 to 56.3)                                | 17,708                      | 363,511        | 58.4 (57.5 to 59.2)                                | 6,913                  | 87,279      | 77.6 (75.9 to 79.3)                                |
| North East      | 17,144                      | 229,358     | 74.6 (73.6 to 75.7)                                | 13,791                      | 175,554        | 75.2 (74.0 to 76.4)                                | 45,946                 | 656,831     | 69.0 (68.4 to 69.6)                                |
| North West      | 32,202                      | 452,867     | 69.3 (68.5 to 70.0)                                | 29,851                      | 436,418        | 66.2 (65.5 to 66.9)                                | 27,562                 | 521,701     | 51.4 (50.8 to 52)                                  |
| South Central   | 26,134                      | 515,603     | 50.1 (49.5 to 50.7)                                | 5,741                       | 126,728        | 43.9 (42.8 to 45.0)                                | 25,571                 | 450,142     | 55.1 (54.5 to 55.8)                                |

©Julia Hipisley-Cox, 2013

## Predicting Risk of Emergency Admission - QAdmissions

|                    |              |             |                                                            |              |             |                                                            |              |             |                                                            |
|--------------------|--------------|-------------|------------------------------------------------------------|--------------|-------------|------------------------------------------------------------|--------------|-------------|------------------------------------------------------------|
| South East Coast   | 23,849       | 408,445     | 52.9 (52.3 to 53.6)                                        | 5,482        | 105,833     | 50.3 (49.0 to 51.6)                                        | 29,319       | 471,571     | 57.4 (56.7 to 58)                                          |
| South West         | 40,724       | 691,067     | 54.0 (53.5 to 54.5)                                        | 10,114       | 156,593     | 57.6 (56.5 to 58.7)                                        | 28,495       | 450,503     | 60.7 (60.1 to 61.4)                                        |
| West Midlands      | 26,996       | 420,830     | 59.6 (58.9 to 60.3)                                        | 11,487       | 181,712     | 59.2 (58.2 to 60.2)                                        | 10,077       | 149,034     | 63.5 (62.3 to 64.6)                                        |
|                    | <b>cases</b> | <b>pyrs</b> | <b>Age/sex<br/>standardised rate per<br/>1000 (95% CI)</b> | <b>cases</b> | <b>pyrs</b> | <b>Age/sex<br/>standardised rate<br/>per 1000 (95% CI)</b> | <b>cases</b> | <b>pyrs</b> | <b>Age/sex<br/>standardised rate<br/>per 1000 (95% CI)</b> |
| <b>Ethnicity</b>   |              |             |                                                            |              |             |                                                            |              |             |                                                            |
| White/not recorded | 248,023      | 4,179,915   | 56.8 (56.6 to 57.0)                                        | 123918       | 2031918     | 58.4 (58.1 to 58.7)                                        | 224,317      | 3,667,301   | 58.9(58.6 to 59.1)                                         |
| Indian             | 2,822        | 69,939      | 55.7 (53.5 to 58.0)                                        | 1,542        | 34,821      | 58.9 (55.8 to 62.1)                                        | 2,027        | 44,446      | 59.9(57.2 to 62.7)                                         |
| Pakistani          | 1,981        | 35,724      | 75.5 (71.4 to 79.5)                                        | 1,452        | 23,474      | 85.8 (80.4 to 91.2)                                        | 1,230        | 19,049      | 89.3(82.9 to 95.6)                                         |
| Bangladeshi        | 1,548        | 33,347      | 75.4 (70.3 to 80.5)                                        | 848          | 16,546      | 84.5 (77.0 to 92.0)                                        | 297          | 5,956       | 76.3(65.9 to 86.7)                                         |
| Other Asian        | 1,757        | 52,332      | 51.5 (48.4 to 54.5)                                        | 757          | 20,622      | 51.6 (46.8 to 56.4)                                        | 1,134        | 29,731      | 52.9(49.1 to 56.7)                                         |
| Caribbean          | 2,631        | 37,728      | 72.3 (69.6 to 75.1)                                        | 925          | 14,644      | 64.6 (60.5 to 68.7)                                        | 1,093        | 16,468      | 69.4(65.3 to 73.6)                                         |
| Black African      | 2,637        | 62,229      | 56.8 (53.4 to 60.1)                                        | 1,442        | 32,407      | 62.0 (56.8 to 67.2)                                        | 1,538        | 35,515      | 59.7(53.8 to 65.7)                                         |
| Chinese            | 499          | 35,304      | 34.2 (30.1 to 38.2)                                        | 254          | 11,556      | 37.5 (32.2 to 42.7)                                        | 233          | 9,838       | 37.9(31.8 to 44.0 )                                        |
| Other              | 3,675        | 91,026      | 58.0 (55.7 to 60.3)                                        | 1,585        | 36,297      | 56.9 (53.4 to 60.3)                                        | 2,335        | 50,694      | 63.2(59.9 to 66.4)                                         |

**Table 3 Adjusted hazard ratios (95% CI) for emergency admission to hospital for the final QAdmissions model in the derivation cohort. Hazard ratios are adjusted for fractional polynomial terms for age and BMI. Final model included age interaction terms.**

|                                          | Women adjusted hazard ratio <sup>s</sup> (95% CI) | Men adjusted hazard ratio <sup>s</sup> (95% CI) |
|------------------------------------------|---------------------------------------------------|-------------------------------------------------|
| <b>Ethnicity</b>                         |                                                   |                                                 |
| White/not recorded                       | 1.00                                              | 1.00                                            |
| Indian                                   | 1.00 (0.95 to 1.06 )                              | 0.92 (0.87 to 0.97 )                            |
| Pakistani                                | 1.18 (1.11 to 1.26 )                              | 1.01 (0.94 to 1.08 )                            |
| Bangladeshi                              | 1.03 (0.96 to 1.11 )                              | 0.86 (0.79 to 0.92 )                            |
| Other Asian                              | 0.88 (0.83 to 0.94 )                              | 0.87 (0.81 to 0.93 )                            |
| Caribbean                                | 1.21 (1.15 to 1.28 )                              | 1.16 (1.10 to 1.24 )                            |
| Black African                            | 1.23 (1.17 to 1.29 )                              | 0.95 (0.89 to 1.01 )                            |
| Chinese                                  | 0.48 (0.43 to 0.54 )                              | 0.43 (0.37 to 0.49 )                            |
| Other                                    | 1.03 (0.99 to 1.08 )                              | 0.95 (0.90 to 1.00 )                            |
| <b>Strategic Health Authority</b>        |                                                   |                                                 |
| East Midlands SHA                        | 1.00                                              | 1.00                                            |
| Yorkshire & Humber SHA                   | 1.09 (1.06 to 1.12 )                              | 1.10 (1.07 to 1.13 )                            |
| East of England SHA                      | 0.99 (0.96 to 1.02 )                              | 1.00 (0.97 to 1.03 )                            |
| London SHA                               | 0.97 (0.95 to 0.99 )                              | 0.91 (0.89 to 0.94 )                            |
| North East SHA                           | 1.19 (1.16 to 1.23 )                              | 1.16 (1.12 to 1.19 )                            |
| North West SHA                           | 1.15 (1.12 to 1.18 )                              | 1.16 (1.13 to 1.19 )                            |
| South Central SHA                        | 0.98 (0.96 to 1.01 )                              | 0.99 (0.96 to 1.02 )                            |
| South East SHA                           | 1.04 (1.01 to 1.07 )                              | 1.02 (0.99 to 1.05 )                            |
| South West SHA                           | 1.00 (0.97 to 1.02 )                              | 1.01 (0.98 to 1.04 )                            |
| West Midlands SHA                        | 1.08 (1.05 to 1.11 )                              | 1.07 (1.04 to 1.10 )                            |
| <b>smoking status</b>                    |                                                   |                                                 |
| non-smoker                               | 1.00                                              | 1.00                                            |
| Ex- smoker                               | 1.13 (1.11 to 1.14 )                              | 1.14 (1.12 to 1.15 )                            |
| light smoker (1-9/day)                   | 1.31 (1.29 to 1.33 )                              | 1.36 (1.34 to 1.39 )                            |
| moderate smoker (10-19/day)              | 1.31 (1.28 to 1.35 )                              | 1.40 (1.37 to 1.44 )                            |
| heavy smoker (20+/day)                   | 1.41 (1.37 to 1.46 )                              | 1.54 (1.50 to 1.59 )                            |
| <b>alcohol status</b>                    |                                                   |                                                 |
| non-drinker                              | 1.00                                              | 1.00                                            |
| Trivial <1 unit/day                      | 0.85 (0.84 to 0.86 )                              | 0.85 (0.83 to 0.86 )                            |
| Light 1-2 units/day                      | 0.80 (0.79 to 0.82 )                              | 0.81 (0.79 to 0.82 )                            |
| Moderate 3-6 units/day                   | 0.82 (0.80 to 0.84 )                              | 0.81 (0.79 to 0.82 )                            |
| Heavy 7-9 units/day                      | 1.27 (1.17 to 1.37 )                              | 0.94 (0.90 to 0.97 )                            |
| Very Heavy >9 units/day                  | 1.28 (1.17 to 1.39 )                              | 1.16 (1.11 to 1.22 )                            |
| <b>Emergency admissions in last year</b> |                                                   |                                                 |
| None                                     | 1.00                                              | 1.00                                            |
| 1 emergency admission                    | 2.74 (2.68 to 2.81 )                              | 2.62 (2.55 to 2.69 )                            |
| 2 emergency admissions                   | 4.44 (4.27 to 4.62 )                              | 4.43 (4.23 to 4.64 )                            |
| 3+ emergency admissions                  | 7.48 (7.14 to 7.84 )                              | 8.27 (7.85 to 8.71 )                            |

## Predicting Risk of Emergency Admission - QAdmissions

| <b>Clinical values and deprivation</b>      |                      |                      |
|---------------------------------------------|----------------------|----------------------|
| Townsend Score (5 unit increase)            | 1.10 (1.09 to 1.11 ) | 1.11 (1.10 to 1.12 ) |
| most recent Haemoglobin <11g/dl $\pm$       | 1.30 (1.27 to 1.32 ) | 1.60 (1.54 to 1.65 ) |
| most recent platelet >480 $\pm$             | 1.28 (1.23 to 1.33 ) | 1.25 (1.18 to 1.32 ) |
| most recent LFTs 3 times normal $\pm$       | 1.44 (1.39 to 1.49 ) | 1.48 (1.44 to 1.53 ) |
| <b>co-morbidity</b>                         |                      |                      |
| type 1 diabetes $\pm$                       | 2.17 (2.04 to 2.30 ) | 2.15 (2.03 to 2.29 ) |
| type 2 diabetes $\pm$                       | 1.37 (1.31 to 1.43 ) | 1.33 (1.27 to 1.40 ) |
| atrial fibrillation $\pm$                   | 1.32 (1.28 to 1.35 ) | 1.77 (1.62 to 1.93 ) |
| cardiovascular disease $\pm$                | 1.36 (1.34 to 1.38 ) | 1.80 (1.71 to 1.89 ) |
| congestive cardiac failure $\pm$            | 1.19 (1.15 to 1.22 ) | 1.27 (1.23 to 1.30 ) |
| venous thromboembolism $\pm$                | 1.41 (1.34 to 1.47 ) | 1.66 (1.56 to 1.76 ) |
| cancer $\pm$                                | 1.35 (1.32 to 1.37 ) | 1.44 (1.41 to 1.47 ) |
| asthma or COPD $\pm$                        | 1.20 (1.18 to 1.22 ) | 1.20 (1.18 to 1.22 ) |
| epilepsy $\pm$                              | 1.59 (1.52 to 1.66 ) | 1.71 (1.64 to 1.79 ) |
| falls $\pm$                                 | 1.27 (1.25 to 1.29 ) | 1.36 (1.33 to 1.38 ) |
| manic depression or schizophrenia $\pm$     | 1.37 (1.30 to 1.44 ) | 1.39 (1.31 to 1.48 ) |
| chronic renal disease $\pm$                 | 2.10 (1.94 to 2.27 ) | 1.86 (1.70 to 2.03 ) |
| Conditions causing malabsorption $\pm$      | 1.47 (1.40 to 1.55 ) | 1.60 (1.51 to 1.69 ) |
| liver disease or chronic pancreatitis $\pm$ | 1.54 (1.44 to 1.64 ) | 1.91 (1.81 to 2.03 ) |
| <b>medications</b>                          |                      |                      |
| NSAIDs $\pm$                                | 1.35 (1.33 to 1.38 ) | 1.48 (1.45 to 1.51 ) |
| anticoagulant $\pm$                         | 1.69 (1.57 to 1.82 ) | 1.61 (1.49 to 1.75 ) |
| corticosteroids $\pm$                       | 1.50 (1.47 to 1.52 ) | 1.52 (1.49 to 1.55 ) |
| antidepressant $\pm$                        | 1.66 (1.64 to 1.69 ) | 1.72 (1.68 to 1.75 ) |
| antipsychotic $\pm$                         | 1.68 (1.64 to 1.73 ) | 1.60 (1.53 to 1.66 ) |

Notes: Models also included fractional polynomial terms for age and body mass index

<sup>§</sup> hazard ratios simultaneously adjusted for all the other variables shown in the table as well as fractional polynomial terms for age and body mass index

$\pm$  compared with patients without the condition/medication at baseline

For women: fractional polynomial terms were;  $(age/10)^{-2}$  and  $(age/10)^{-2} \ln(age)$ ;  $(bmi/10)^{-2}$  and  $(bmi/10)^{-2} \ln(bmi)$

For men: fractional polynomial terms were  $(age/10)^{-2}$  and  $(age/10)^{-2} \ln(age)$ ;  $(bmi/10)^{-2}$  and  $(bmi/10)^{-2} \ln(bmi)$

The models for men and women also included interactions between the age terms and prior admissions, type2 diabetes, venous thromboembolism, epilepsy, manic depression/schizophrenia, chronic renal disease, malabsorption, chronic liver/pancreatic disease, NSAIDs, anticoagulants, antidepressants and antipsychotics. In addition for men, there were interactions between the age terms and atrial fibrillation and cardiovascular disease. Hazard ratios for these variables in the table are evaluated at mean age in men and women.

## Predicting Risk of Emergency Admission - QAdmissions

**Table 4** Validation statistics for the QAdmissions prediction algorithm in the QResearch and CPRD validation cohorts using (a) the score calculated using the GP-HES linked data and (b) the score calculated using the GP data alone.

|                    | QResearch validation cohort |                           | CPRD validation cohort    |                           |
|--------------------|-----------------------------|---------------------------|---------------------------|---------------------------|
|                    | HES-GP linked data          | GP data alone             | HES-GP linked data        | GP data alone             |
| <b>women</b>       |                             |                           |                           |                           |
| ROC statistic      | 0.773<br>(0.771 to 0.774)   | 0.764<br>(0.762 to 0.766) | 0.771<br>(0.770 to 0.773) | 0.764<br>(0.763 to 0.766) |
| R <sup>2</sup> (%) | 40.6<br>(40.2 to 40.9)      | 37.3<br>(37.0 to 37.8)    | 40.5<br>(40.2 to 40.8)    | 37.6<br>(37.3 to 37.9)    |
| D statistic        | 1.69<br>(1.68 to 1.70)      | 1.58<br>(1.57 to 1.59)    | 1.69<br>(1.68 to 1.70)    | 1.59<br>(1.58 to 1.60)    |
|                    |                             |                           |                           |                           |
| <b>men</b>         |                             |                           |                           |                           |
| ROC statistic      | 0.776<br>(0.774 to 0.778)   | 0.769<br>(0.767 to 0.771) | 0.772<br>(0.771 to 0.774) | 0.767<br>(0.765 to 0.768) |
| R <sup>2</sup> (%) | 42.6<br>(42.2 to 42.9)      | 39.5<br>(39.1 to 39.9)    | 41.9<br>(41.6 to 42.2)    | 39.2<br>(38.9 to 39.5)    |
| D statistic        | 1.76<br>(1.75 to 1.78)      | 1.65<br>(1.64 to 1.67)    | 1.74<br>(1.73 to 1.750)   | 1.64<br>(1.63 to 1.65)    |

Notes on understanding validation statistics:

Discrimination is the ability of the risk prediction model to differentiate between patients who experience a admission event during the study and those who do not. This measure is quantified by calculating the area under the receiver operating characteristic curve (ROC) statistic; where a value of 1 represents perfect discrimination.

The D statistic is also a measure of discrimination which is specific to censored survival data. As with the ROC, higher values indicate better discrimination.

R<sup>2</sup> is another measure specific to censored survival data– it measures explained variation and higher values indicate more variation is explained.

**Table 5 Performance of QAdmissions for predicting emergency admissions in the QResearch and CPRD validation cohorts based on (a) the score calculated using the GP-HES linked data and (b) the score calculated using the GP data alone.**

|                           | QResearch validation cohort         |                               |                 |                                                  | CPRD validation cohort              |                               |                 |                                                  |
|---------------------------|-------------------------------------|-------------------------------|-----------------|--------------------------------------------------|-------------------------------------|-------------------------------|-----------------|--------------------------------------------------|
| <b>2 year risk score</b>  | cut off for 2 year predicted risk % | total classified as high risk | Sensitivity (%) | Observed risk of admission at 2 years value* (%) | cut off for 2 year predicted risk % | total classified as high risk | Sensitivity (%) | Observed risk of admission at 2 years value* (%) |
| <b>HES-GP linked data</b> |                                     |                               |                 |                                                  |                                     |                               |                 |                                                  |
| top 1%                    | 69.2                                | 13,406                        | 6.6             | 72.5                                             | 67.5                                | 24,753                        | 6.7             | 72.7                                             |
| top 5%                    | 35.9                                | 67,031                        | 24.6            | 53.0                                             | 35.1                                | 123,768                       | 24.9            | 53.3                                             |
| top 10%                   | 23.0                                | 134,062                       | 39.3            | 41.8                                             | 22.4                                | 247,536                       | 39.4            | 41.8                                             |
| top 20%                   | 13.4                                | 268,124                       | 56.9            | 30.0                                             | 13.1                                | 495,072                       | 56.8            | 29.9                                             |
|                           |                                     |                               |                 |                                                  |                                     |                               |                 |                                                  |
| <b>GP data only</b>       |                                     |                               |                 |                                                  |                                     |                               |                 |                                                  |
| top 1%                    | 56.7                                | 13,406                        | 6.0             | 65.9                                             | 65.6                                | 24,753                        | 6.1             | 66                                               |
| top 5%                    | 30.9                                | 67,031                        | 23.4            | 50.0                                             | 35.9                                | 123,768                       | 23.2            | 49.6                                             |
| top 10%                   | 20.6                                | 134,062                       | 37.7            | 39.8                                             | 23.8                                | 247,536                       | 37.4            | 39.7                                             |
| top 20%                   | 12.6                                | 268,124                       | 55.5            | 29.1                                             | 14.2                                | 495,072                       | 55.1            | 29.1                                             |

\*observed risk is an estimate of the positive predictive value.



1  
2  
3  
4  
5  
6  
7  
8  
9  
10  
11  
12  
13  
14  
15  
16  
17  
18  
19  
20  
21  
22  
23  
24  
25  
26  
27  
28  
29  
30  
31  
32  
33  
34  
35  
36  
37  
38  
39  
40  
41  
42  
43  
44  
45  
46  
47  
48  
49  
50  
51  
52  
53  
54  
55  
56  
57  
58  
59  
60

**Figure legends:**

**Figure 1** Mean predicted risks and observed risk of emergency admission to hospital at 2 years by tenth of predicted risk applying the QAdmissions risk prediction scores to all patients in the QResearch validation cohort (results from CPRD available from the authors).

**Figure 2 and 3:** Clinical cases:

For peer review only

STROBE Statement—Checklist of items that should be included in reports of *cohort studies*

|                           | Item No | Recommendation                                                                                                                                                                                      | Page in manuscript            |
|---------------------------|---------|-----------------------------------------------------------------------------------------------------------------------------------------------------------------------------------------------------|-------------------------------|
| <b>Title and abstract</b> | 1       | (a) Indicate the study's design with a commonly used term in the title or the abstract                                                                                                              | Page 2 abstract               |
|                           |         | (b) Provide in the abstract an informative and balanced summary of what was done and what was found                                                                                                 | Page 2                        |
| <b>Introduction</b>       |         |                                                                                                                                                                                                     |                               |
| Background/rationale      | 2       | Explain the scientific background and rationale for the investigation being reported                                                                                                                | Page 4                        |
| Objectives                | 3       | State specific objectives, including any prespecified hypotheses                                                                                                                                    | Page 4                        |
| <b>Methods</b>            |         |                                                                                                                                                                                                     |                               |
| Study design              | 4       | Present key elements of study design early in the paper                                                                                                                                             | Page 2, page 5                |
| Setting                   | 5       | Describe the setting, locations, and relevant dates, including periods of recruitment, exposure, follow-up, and data collection                                                                     | Page 2, 5                     |
| Participants              | 6       | (a) Give the eligibility criteria, and the sources and methods of selection of participants. Describe methods of follow-up                                                                          | Page 5                        |
|                           |         | (b) For matched studies, give matching criteria and number of exposed and unexposed                                                                                                                 | n/a                           |
| Variables                 | 7       | Clearly define all outcomes, exposures, predictors, potential confounders, and effect modifiers. Give diagnostic criteria, if applicable                                                            | Page 5 & 6                    |
| Data sources/measurement  | 8*      | For each variable of interest, give sources of data and details of methods of assessment (measurement). Describe comparability of assessment methods if there is more than one group                | Pages 6                       |
| Bias                      | 9       | Describe any efforts to address potential sources of bias                                                                                                                                           | Page 6                        |
| Study size                | 10      | Explain how the study size was arrived at                                                                                                                                                           | Page 8                        |
| Quantitative variables    | 11      | Explain how quantitative variables were handled in the analyses. If applicable, describe which groupings were chosen and why                                                                        | Pages 6, 7, 8                 |
| Statistical methods       | 12      | (a) Describe all statistical methods, including those used to control for confounding                                                                                                               | Pages 7, 8                    |
|                           |         | (b) Describe any methods used to examine subgroups and interactions                                                                                                                                 | Page 6                        |
|                           |         | (c) Explain how missing data were addressed                                                                                                                                                         | Page 7                        |
|                           |         | (d) If applicable, explain how loss to follow-up was addressed                                                                                                                                      |                               |
|                           |         | (e) Describe any sensitivity analyses                                                                                                                                                               | Page 7,8                      |
| <b>Results</b>            |         |                                                                                                                                                                                                     |                               |
| Participants              | 13*     | (a) Report numbers of individuals at each stage of study—eg numbers potentially eligible, examined for eligibility, confirmed eligible, included in the study, completing follow-up, and analysed   | Page 9                        |
|                           |         | (b) Give reasons for non-participation at each stage                                                                                                                                                |                               |
|                           |         | (c) Consider use of a flow diagram                                                                                                                                                                  |                               |
| Descriptive data          | 14*     | (a) Give characteristics of study participants (eg demographic, clinical, social) and information on exposures and potential confounders                                                            | Page 9 tables 2, 3            |
|                           |         | (b) Indicate number of participants with missing data for each variable of interest                                                                                                                 | table 2                       |
|                           |         | (c) Summarise follow-up time (eg, average and total amount)                                                                                                                                         | Page 9 Table 2                |
| Outcome data              | 15*     | Report numbers of outcome events or summary measures over time                                                                                                                                      | Page 9                        |
| Main results              | 16      | (a) Give unadjusted estimates and, if applicable, confounder-adjusted estimates and their precision (eg, 95% confidence interval). Make clear which confounders were adjusted for and why they were | Pages 10, 11 Table 3, table 5 |

|                          |    |                                                                                                                                                                            |              |
|--------------------------|----|----------------------------------------------------------------------------------------------------------------------------------------------------------------------------|--------------|
|                          |    | included                                                                                                                                                                   |              |
|                          |    | (b) Report category boundaries when continuous variables were categorized                                                                                                  | Page 6       |
|                          |    | (c) If relevant, consider translating estimates of relative risk into absolute risk for a meaningful time period                                                           | Page 11      |
| Other analyses           | 17 | Report other analyses done—eg analyses of subgroups and interactions, and sensitivity analyses                                                                             | Page 11      |
| <b>Discussion</b>        |    |                                                                                                                                                                            |              |
| Key results              | 18 | Summarise key results with reference to study objectives                                                                                                                   | Page 12      |
| Limitations              | 19 | Discuss limitations of the study, taking into account sources of potential bias or imprecision. Discuss both direction and magnitude of any potential bias                 | Page 12- 13, |
| Interpretation           | 20 | Give a cautious overall interpretation of results considering objectives, limitations, multiplicity of analyses, results from similar studies, and other relevant evidence | Page 13      |
| Generalisability         | 21 | Discuss the generalisability (external validity) of the study results                                                                                                      | Page 13      |
| <b>Other information</b> |    |                                                                                                                                                                            |              |
| Funding                  | 22 | Give the source of funding and the role of the funders for the present study and, if applicable, for the original study on which the present article is based              | Page 15      |

Figure 1 Mean predicted risks and observed risk of emergency admission to hospital at 2 years by tenth of predicted risk applying the QAdmissions risk prediction scores to all patients in the QResearch validation cohort (results from CPRD available from the authors).

(a) QAdmissions score calculated using the HES-GP linked data

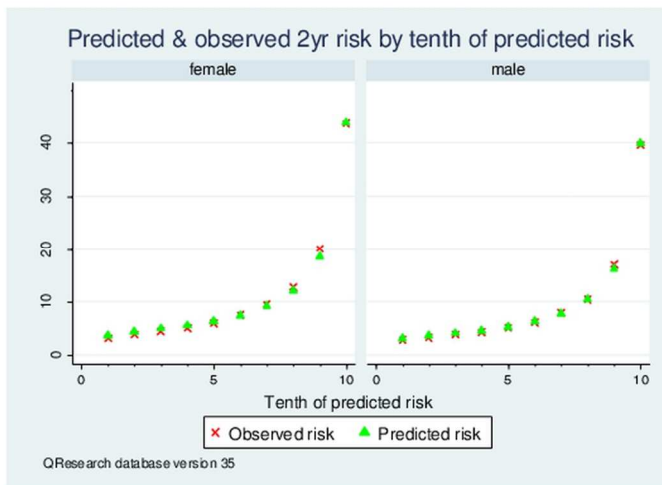

(b) QAdmissions score calculated based on GP data alone

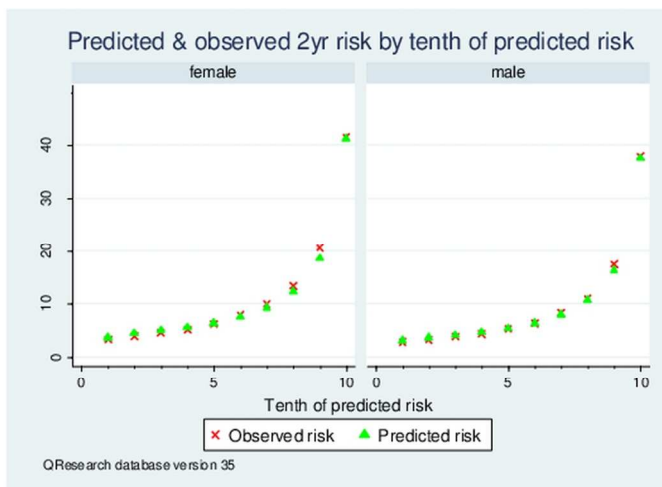

90x134mm (300 x 300 DPI)

53 year old white man from the South West, ex-smoker, drinks 7-9 units/day, has type 2 diabetes, body mass index of 39.1 kg/m<sup>2</sup> currently prescribed antidepressants, with last haemoglobin of under 11g/dl and an abnormal liver function test, has a 29% risk of having an emergency admission within the next two years as shown in the screen shot below ([www.qadmissions.org](http://www.qadmissions.org)). This level of risk would put him in the top 10% of patients at risk of emergency admission. The same man without anaemia or abnormal LFTs would have a risk of 14%.

ClinRisk  Welcome to the QAdmissions® risk calculator: <http://qadmissions.org>

Reset Information Publications About Copyright Contact Us Algorithm Software

Calculate risk over 2 years.

**About the person**

Age (18-100): 53  
 Sex:  Male  Female  
 Ethnicity: White or not stated  
 UK postcode: leave blank if unknown  
 Postcode:

**Necessary information**

Stategic health authority: South West  
 Smoking status: ex-smoker  
 Alcohol status: 7-9 units per day  
 Emergency admissions in the last year: none  
 diabetes: type 2  
 Heart attack, angina, stroke or TIA?   
 Atrial fibrillation?   
 Congestive cardiac failure?   
 Chronic renal disease?   
 Venous thrombo-embolism?   
 Cancer?   
 Asthma or COPD?   
 Falls?   
 Epilepsy?   
 Manic depression or schizophrenia?   
 Malabsorption eg Crohn's disease, ulcerative colitis, coeliac disease, steatorrhea, blind loop syndrome?   
 Chronic liver/pancreatic disease?   
**Blood tests**  
 Abnormal LFTs (GGT, ALT or bilirubin more than 3 times normal)?   
 Anaemia (hb under 11g/dl)?   
 Platelets > 480?   
**Drugs**  
 taking anticoagulants (eg warfarin)?   
 taking antidepressants?   
 taking antipsychotics?   
 taking anti-inflammatory painkillers (NSAIDs)?   
 taking steroid tablets regularly?   
 Leave blank if unknown  
**Body mass index**  
 Height (cm): 160  
 Weight (kg): 100

**The results**

The person's risk of having an emergency hospital admission within the next two years is: **29%**

In other words, in a crowd of 100 people with the same risk factors as the person, 29 are likely to have an emergency hospital admission within the next two years.



Risk of an emergency hospital admission

The person's score has been calculated using estimated data, as some information was left blank.

The person's body mass index was calculated as 39.06 kg/m<sup>2</sup>.

90x119mm (300 x 300 DPI)

1  
2  
3  
4  
5  
6  
7  
8  
9  
10  
11  
12  
13  
14  
15  
16  
17  
18  
19  
20  
21  
22  
23  
24  
25  
26  
27  
28  
29  
30  
31  
32  
33  
34  
35  
36  
37  
38  
39  
40  
41  
42  
43  
44  
45  
46  
47  
48  
49  
50  
51  
52  
53  
54  
55  
56  
57  
58  
59  
60

A 65 year old Bangladeshi women from the North West, non-smoker, no-drinker, with a body mass index of 26.3 Kg/m<sup>2</sup> who has atrial fibrillation on anticoagulants and steroid, with one emergency admission in the last year, has a 39% risk of emergency admission in the next two years as shown in the screen shot below.

ClinRisk  Welcome to the QAdmissions® risk calculator: <http://qadmissions.org>

Reset Information Publications About Copyright Contact Us Algorithm Software

Calculate risk over 2 years.

**About the person**

Age (18-100): 65

Sex:  Male  Female

Ethnicity: Bangladeshi

UK postcode: leave blank if unknown

Postcode:

**Necessary information**

Strategic health authority: North West

Smoking status: non-smoker

Alcohol status: none

Emergency admissions in the last year: one

diabetes: none

Heart attack, angina, stroke or TIA?

Atrial fibrillation?

Congestive cardiac failure?

Chronic renal disease?

Venous thrombo-embolism?

Cancer?

Asthma or COPD?

Falls?

Epilepsy?

Manic depression or schizophrenia?

Malabsorption eg Crohn's disease, ulcerative colitis, coeliac disease, steatorrhea, blind loop syndrome?

Chronic liver/pancreatic disease?

**Blood tests**

Abnormal LFTs (GGT, ALT or bilirubin more than 3 times normal)?

Anaemia (hb under 11g/dl)?

Platelets > 480?

**Drugs**

taking anticoagulants (eg warfarin)?

taking antidepressants?

taking antipsychotics?

taking anti-inflammatory painkillers (NSAIDS)?

taking steroid tablets regularly?

**Leave blank if unknown**

**Body mass index**

Height (cm):

Weight (kg):

**The results**

The person's risk of having an emergency hospital admission within the next two years is:

**38.5%**

In other words, in a crowd of 100 people with the same risk factors as the person, 39 are likely to have an emergency hospital admission within the next two years.



Risk of an emergency hospital admission

The person's score has been calculated using estimated data, as some information was left blank.

The person's body mass index was estimated as 26.3 kg/m<sup>2</sup>.

90x105mm (300 x 300 DPI)

**Appendix Table A:**

Clinical codes used to identify emergency hospital admission or casualty attendance on GP clinical record. This is for use as a predictor variable for when the algorithm is applied to GP data only.

| <b>Read or EMIS code</b> | <b>Description</b>              |
|--------------------------|---------------------------------|
| <b>7M300</b>             | Emergency operation NOC         |
| <b>8H1</b>               | Admit to intensive care unit    |
| <b>8H1-1</b>             | Admit to I.T.U.                 |
| <b>8H11</b>              | Admit to cardiac ITU            |
| <b>8H12</b>              | Admit to respiratory ITU        |
| <b>8H13</b>              | Admit to neurological ITU       |
| <b>8H14</b>              | Admit to metabolic ITU          |
| <b>8H1Z</b>              | Admit to intensive c.u. NOS     |
| <b>8H2</b>               | Emergency hospital admission    |
| <b>8H21</b>              | Admit medical emergency unsp.   |
| <b>8H22</b>              | Admit surgical emergency unsp.  |
| <b>8H23</b>              | Admit psychiatric emergency     |
| <b>8H230</b>             | Emerg psychiatric admitt MHA    |
| <b>8H24</b>              | Admit geriatric emergency       |
| <b>8H25</b>              | Admit paediatric emergency      |
| <b>8H26</b>              | Admit gynaecological emergency  |
| <b>8H27</b>              | Admit obstetric emergency       |
| <b>8H28</b>              | Admit orthopaedic emergency     |
| <b>8H29</b>              | Admit ENT emergency             |
| <b>8H2A</b>              | Admit trauma emergency          |
| <b>8H2B</b>              | Admit ophthalmological emerg.   |
| <b>8H2C</b>              | Admit rheumatology emergency    |
| <b>8H2D</b>              | Admit dermatology emergency     |
| <b>8H2E</b>              | Admit neurology emergency       |
| <b>8H2F</b>              | Admit urology emergency         |
| <b>8H2G</b>              | Admit radiotherapy emergency    |
| <b>8H2H</b>              | Admit haematology emergency     |
| <b>8H2I</b>              | Admit plastic surgery emergenc  |
| <b>8H2J</b>              | Admit diabetic emergency        |
| <b>8H2K</b>              | Admit oral surgical emergency   |
| <b>8H2L</b>              | Admit psychogeriatric emergency |
| <b>8H2M</b>              | Admit renal medicine emergency  |
| <b>8H2N</b>              | Admit neurosurgical emergency   |
| <b>8H2O</b>              | Admit cardiothoracic emergency  |
| <b>8H2P</b>              | Emergency admission, asthma     |



|    |                   |                                                             |
|----|-------------------|-------------------------------------------------------------|
| 1  |                   |                                                             |
| 2  |                   |                                                             |
| 3  |                   |                                                             |
| 4  | <b>8H2Q</b>       | Admit cardiology emergency                                  |
| 5  | <b>8H2R</b>       | Admit COPD emergency                                        |
| 6  | <b>8H2S</b>       | Admit heart failure emergency                               |
| 7  | <b>8H2T</b>       | Emergency voluntary psychiatric admission Mental Health Act |
| 8  | <b>8H2V</b>       | Admit ischaemic heart disease emergency                     |
| 9  |                   |                                                             |
| 10 | <b>8H2W</b>       | Admit vascular surgery emergency                            |
| 11 | <b>8H2X</b>       | Emergency hospital admission from walk-in centre            |
| 12 | <b>8H2Y</b>       | Admit anticoagulation emergency                             |
| 13 |                   |                                                             |
| 14 | <b>8H2Z</b>       | Admit hospital emergency NOS                                |
| 15 | <b>8H63</b>       | Refer to casualty officer                                   |
| 16 | <b>8H64</b>       | Refer to house officer                                      |
| 17 |                   |                                                             |
| 18 | <b>8H65</b>       | Refer to hospital registrar                                 |
| 19 | <b>8Hb</b>        | Involuntary admission                                       |
| 20 | <b>8HC</b>        | Refer to hospital casualty                                  |
| 21 | <b>8HC1</b>       | Refer to A. & E. department                                 |
| 22 | <b>8HC2</b>       | Refer to hosp. eye casualty                                 |
| 23 | <b>8HC3</b>       | Refer to hosp. paed. casualty                               |
| 24 |                   |                                                             |
| 25 | <b>8HCZ</b>       | Refer to hospital casualty NOS                              |
| 26 |                   |                                                             |
| 27 | <b>8Hd1</b>       | Admission by accident and emergency doctor                  |
| 28 | <b>8Hd3</b>       | Admission by out of hours service doctor                    |
| 29 | <b>8Hd5</b>       | Admission to acute assessment unit                          |
| 30 | <b>8Hd6</b>       | Admission to stroke unit                                    |
| 31 |                   |                                                             |
| 32 | <b>8HJA-1</b>     | Casualty self-referral                                      |
| 33 | <b>8HJZ</b>       | Self-referral to hospital NOS                               |
| 34 | <b>9b0K</b>       | Hospital admission note                                     |
| 35 |                   |                                                             |
| 36 | <b>9N04</b>       | Seen in emergency clinic                                    |
| 37 | <b>9N19</b>       | Seen in hospital casualty                                   |
| 38 | <b>9Nk8</b>       | Seen in eye casualty department                             |
| 39 | <b>EMISNQHO22</b> | Hospital admission, emergency, indirect                     |
| 40 | <b>EMISNQHO53</b> | Hospital admission, emergency, from walk-in centre          |
| 41 |                   |                                                             |
| 42 | <b>EMISQEL1</b>   | Elderly psychiatric emergency admission                     |
| 43 |                   |                                                             |
| 44 |                   |                                                             |
| 45 |                   |                                                             |
| 46 |                   |                                                             |
| 47 |                   |                                                             |
| 48 |                   |                                                             |
| 49 |                   |                                                             |
| 50 |                   |                                                             |
| 51 |                   |                                                             |
| 52 |                   |                                                             |
| 53 |                   |                                                             |
| 54 |                   |                                                             |
| 55 |                   |                                                             |
| 56 |                   |                                                             |
| 57 |                   |                                                             |
| 58 |                   |                                                             |
| 59 |                   |                                                             |
| 60 |                   |                                                             |
